# Supplementary material for: Visible light enhanced gas sensing of CdSe nanoribbons of ethanol
Source: Royal Society of Chemistry journal article supplement (doi:10.1039/c3ce42577k), 2014-01-01
Supplement: c3ce42577k1.pdf [file c3ce42577k1.pdf]

## Supporting Information

# Visible Light Enhanced Gas Sensing of CdSe Nanoribbons to Ethanol

Zhangqing Lin<sup>a</sup>, Fan Liao<sup>a</sup>, Lili Zhu<sup>a</sup>, Shunkai Lu<sup>a</sup>, Minqi Sheng<sup>a,b,\*</sup>, Suning Gao<sup>a</sup>, Mingwang Shao<sup>a,\*</sup>

<sup>a</sup>Institute of Functional Nano & Soft Materials (FUNSOM), Jiangsu Key Laboratory for Carbon-based Functional Materials and Devices & Collaborative Innovation Center of Suzhou Nano Science and Technology, Soochow University, Suzhou 215123, P. R. China;

<sup>b</sup>School of Iron and Steel, Soochow University, Suzhou, Jiangsu, 215123, P. R. China.

1. Response of CdSe nanoribbons-based sensors for ethanol under the dark and visible light illumination at 160 °C.

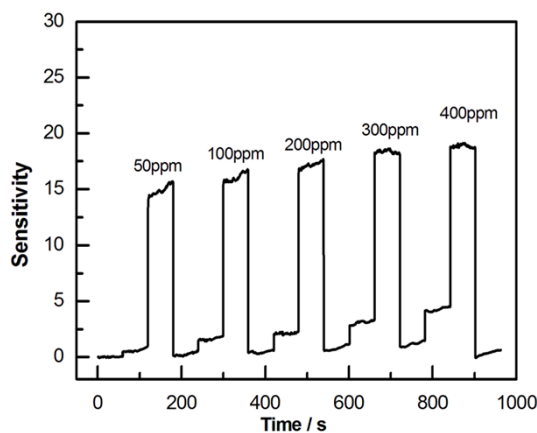

Figure S1. Response of CdSe nanoribbons-based sensors upon exposure to various concentrations of ethanol (50-400 ppm) under the dark and visible light illumination at 160 °C.

2. Response of CdSe nanoribbons-based sensors for ethanol under the dark and visible light illumination at 240 °C.

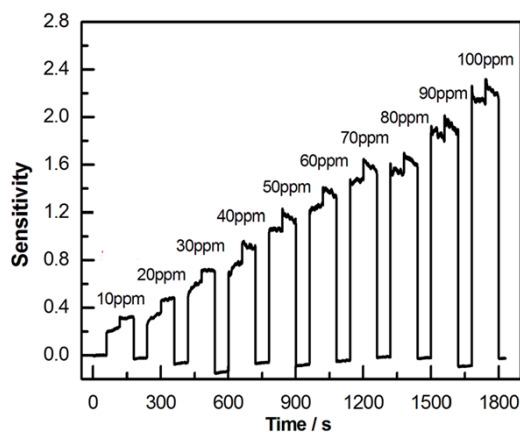

Figure S2. Response of CdSe nanoribbons-based sensors upon exposure to various concentrations of ethanol (10-100 ppm) under the dark and visible light illumination at 240 °C.

3. XRD pattern CdSe nanoribbons under temperature of 300 °C showing the appearance of CdO.

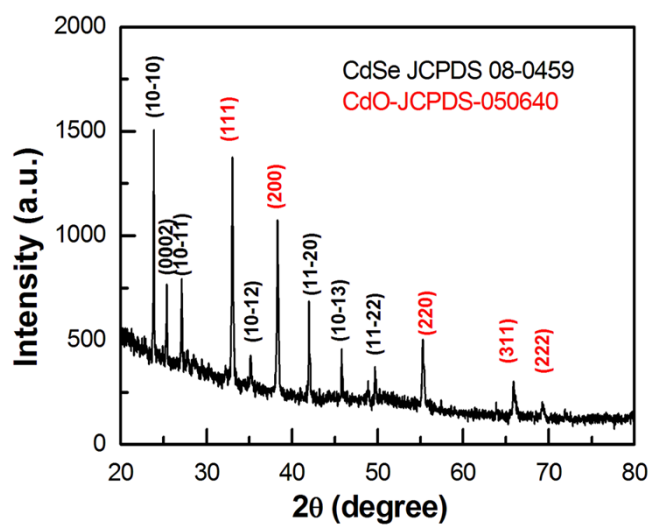

Figure S3. XRD pattern CdSe nanoribbons under temperature of 300 °C showing the

appearance of CdO.

4. Photographs of the experimental setup and gas sensor. We injected a certain amount of ethanol onto the evaporation station through a hole beside the evaporation station with a transfer liquid gun. Then the ethanol was gasified and tested. The size of the CdSe sensor is about  $\Phi 2 \times 5$  mm.

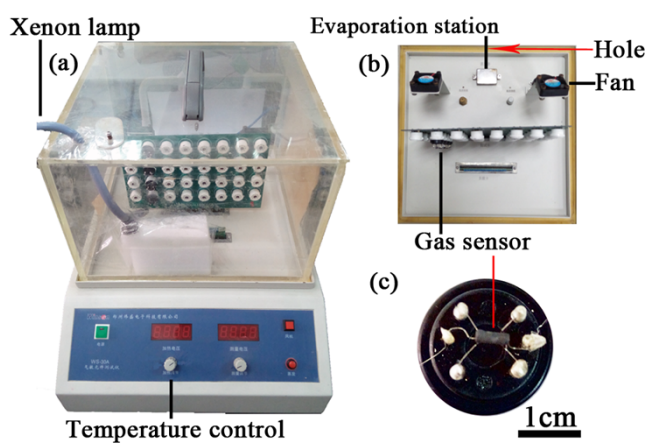

Figure S4. Photographs of the experimental setup and gas sensor.

5. Five sequential cycles of the response transients of the gas sensor after exposure to 500 ppm ethanol at 200 °C.

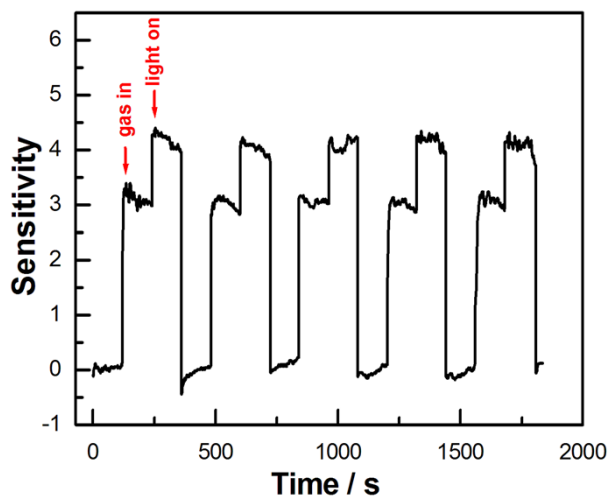

Figure S5. Five sequential cycles of the response transients of the gas sensor after exposure to 500 ppm ethanol at 200 °C.

6. SEM image of the CdSe gas sensor. The thickness of CdSe film was about 25  $\mu\text{m}$ .

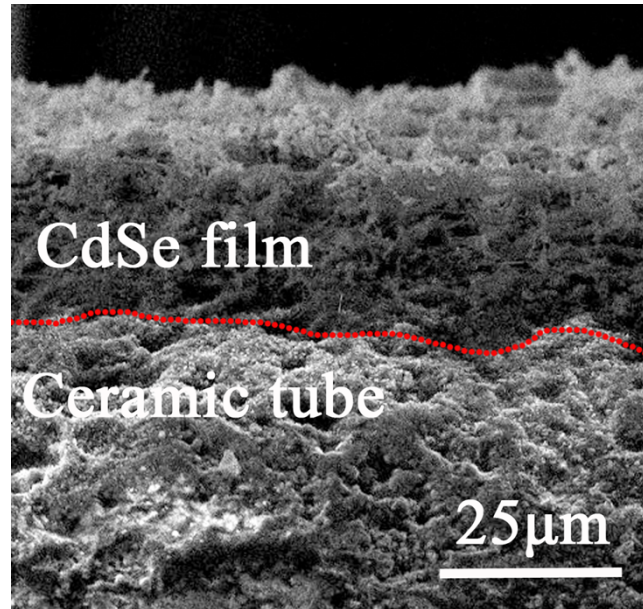

Figure S6. SEM image of the CdSe gas sensor.
